# Supplementary material
Source: publisher figshare collection journal article supplement (https://acs.figshare.com/ndownloader/files/15036020)
Supplement: Supplementary file 1 [file 15036020]

Supporting Information

**A Fingerprintable Hydrogel from Dual Reversible Cross-linking Networks with Different Relaxation Time**

Haoqi Li,<sup>†</sup> Fuyong Liu,<sup>Ω</sup> Zhiyong Li,<sup>\*,†</sup> Shanfeng Wang,<sup>†</sup> Renhua Jin,<sup>‡</sup> Chenyang Liu,<sup>§</sup> and Yongming Chen<sup>\*,†</sup>

<sup>†</sup>School of Materials Science and Engineering, Center of Functional Biomaterials, Key Laboratory of Polymeric Composite Materials and Functional Materials of Ministry of Education, GD Research Center for Functional Biomaterials Engineering and Technology, Sun Yat-sen University, Guangzhou 510275, China.

<sup>‡</sup>Department of Material & Life Chemistry, Kanagawa University, 3-27-1 Rokkakubashi, Kanagawa-ku, Yokohama 221-8686, Japan.

<sup>§</sup>CAS Key Laboratory of Engineering Plastics, Institute of Chemistry, The Chinese Academy of Sciences, Beijing 100190, China.

<sup>Ω</sup>Institute of Environmental Science, Shanxi University, Taiyuan 030006, China.

**Corresponding Authors:**

E-mail, Yongming Chen: [chenym35@mail.sysu.edu.cn](mailto:chenym35@mail.sysu.edu.cn); Zhiyong Li: [lizhy89@mail.sysu.edu.cn](mailto:lizhy89@mail.sysu.edu.cn)

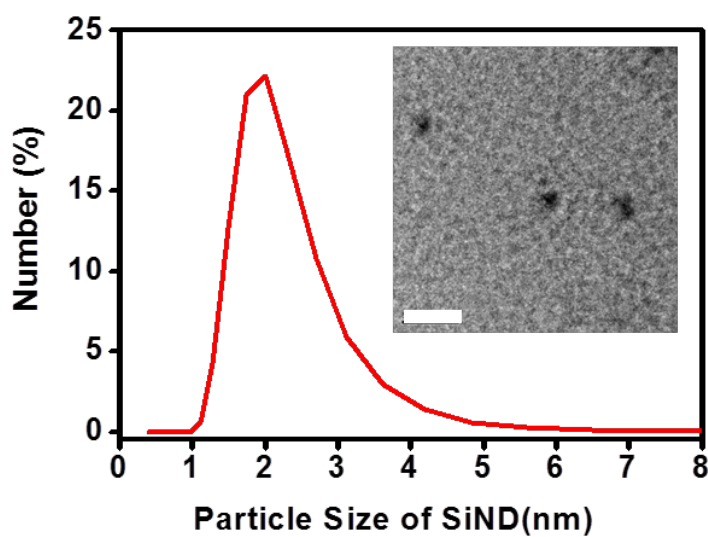

**Figure S1.** Transmission electron microscopy (TEM) image of silica nanodots (SiND) and particle size distribution of 0.1 wt% SiND in ethanol recorded by dynamic light scattering (DLS). Scale bars: 50 nm.

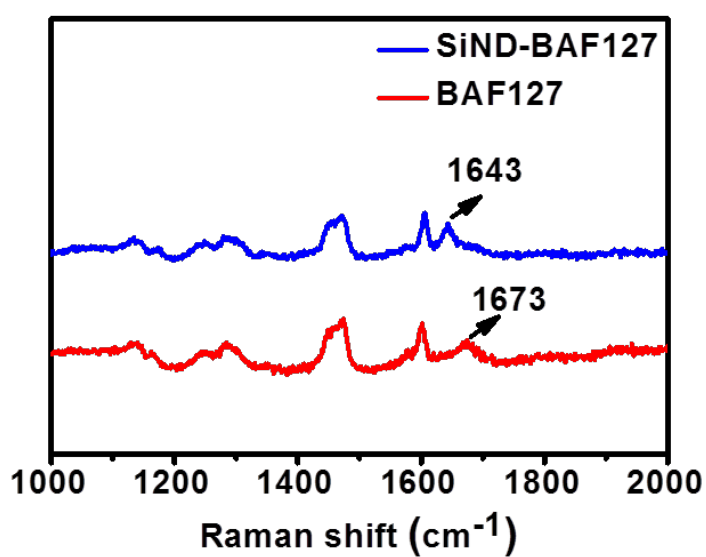

**Figure S2.** Raman spectra of BAF127 and hydrogel consisting of 19 wt% BAF127 and 1 wt% SiND was obtained at pH=12 (Gel<sub>12</sub>).

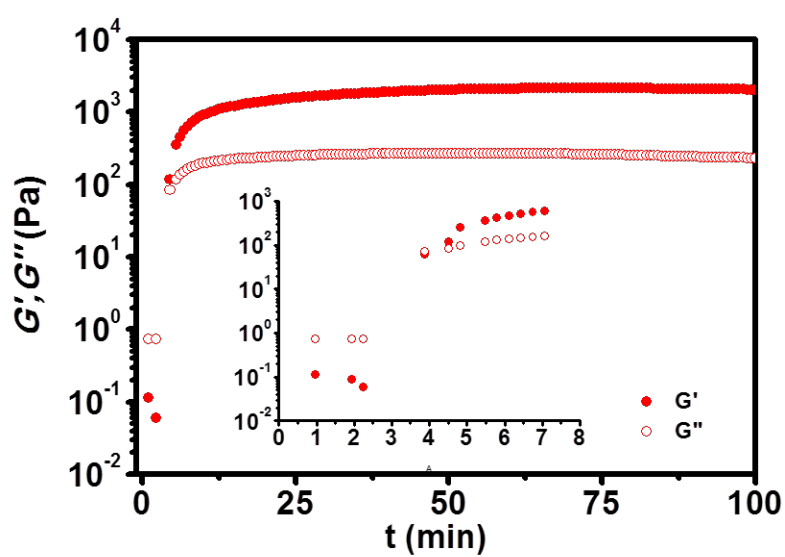

**Figure S3.** Storage modulus ( $G'$ ) and loss modulus ( $G''$ ) of Gel<sub>12</sub> as a function of incubation time at a strain = 5 %, frequency = 1 rad/s, and  $T = 5\text{ }^{\circ}\text{C}$ .
